# Supplementary material
Source: HighWire-hosted journal article supplement (http://d2538ggaoe6cji.cloudfront.net/highwire/filestream/45492/field_highwire_adjunct_files/1/087007-2.pdf)
Supplement: 087007-2.pdf [file 087007-2.pdf]

## Supplementary Information

### **The NDE1 genomic locus can affect treatment of psychiatric illness through gene expression changes related to MicroRNA-484**

Nicholas J. Bradshaw<sup>1,2</sup>, Liisa Ukkola-Vuoti<sup>3,4,5</sup>, Maiju Pankakoski<sup>3</sup>, Amanda B. Zheutlin<sup>6</sup>, Alfredo Ortega-Alonso<sup>3,4</sup>, Minna Torniaainen-Holm<sup>3,4</sup>, Vishal Sinha<sup>3,4,5</sup>, Sebastian Therman<sup>3</sup>, Tiina Paunio<sup>7,8</sup>, Jaana Suvisaari<sup>3</sup>, Jouko Lönnqvist<sup>3,7</sup>, Tyrone D. Cannon<sup>6</sup>, Jari Haukka<sup>3,9</sup>, William Hennah<sup>3,4,5\*</sup>

<sup>1</sup>Department of Neuropathology, Heinrich Heine University, 40225 Düsseldorf, Germany

<sup>2</sup>Department of Biotechnology, University of Rijeka, 51000 Rijeka, Croatia

<sup>3</sup>Department of Health, Mental Health Unit, National Institute for Health and Welfare, 00271 Helsinki, Finland

<sup>4</sup>Institute for Molecular Medicine Finland FIMM, University of Helsinki, 00014 Helsinki, Finland

<sup>5</sup>Medicum, University of Helsinki, 00014 Finland

<sup>6</sup>Department of Psychology, Yale University, New Haven, CT 06520, USA

<sup>7</sup>Department of Psychiatry, University of Helsinki and Helsinki University Hospital, 00014 Helsinki, Finland

<sup>8</sup>Department of Health, Genomics and Biomarkers Unit, National Institute for Health and Welfare, 00271 Helsinki, Finland

<sup>9</sup>Department of Public Health, Clinicum, University of Helsinki, 00014 Helsinki, Finland

\*Corresponding Author:

William Hennah PhD

Institute for Molecular Medicine Finland FIMM, P.O. Box 20, FI-00014 University of Helsinki, Finland

Email: [william.hennah@helsinki.fi](mailto:william.hennah@helsinki.fi)

## FIGURES

**Figure S1:** Graphical representation of the genetic effect of the *NDE1* rs2242549 SNP on the gene expression levels in the discovery cohort of a) the largest GTEx replicated positive effect *RAB24* (ILMN\_2379718) (recessive model [GG and GT vs TT]  $p=3.5 \times 10^{-6}$ ) b) the largest GTEx replicated negative effect *SCNN1D* (ILMN\_1754757) (recessive model [GG and GT vs TT]  $p=6.75 \times 10^{-4}$ ), c) the effect on *TRIOBP* (ILMN\_1735788) (recessive model [GG and GT vs TT]  $p=2.99 \times 10^{-6}$ ) which replicates from our previous study but not in the GTEx database, and d) the non-significant effect on *NDE1* (ILMN\_1739805) which is highly significant in the GTEx database ( $p=2.3 \times 10^{-10}$ ).

a)

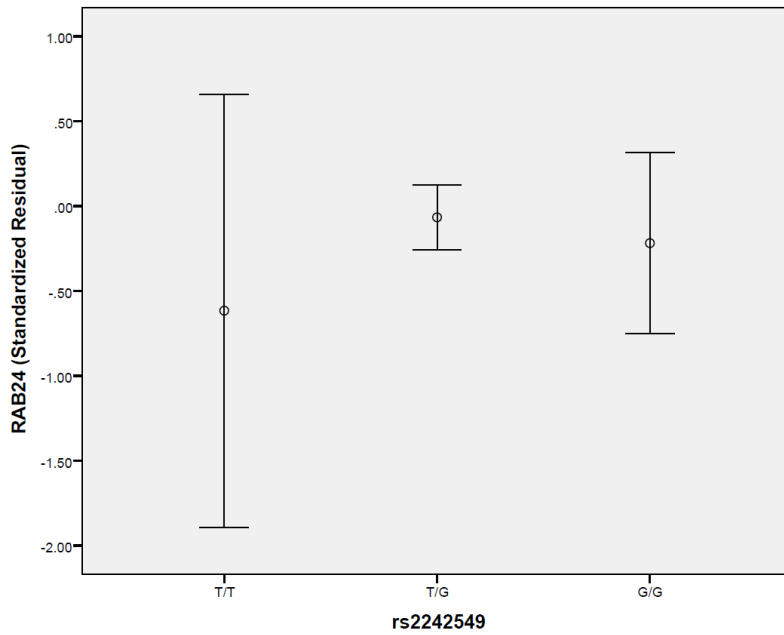

b)

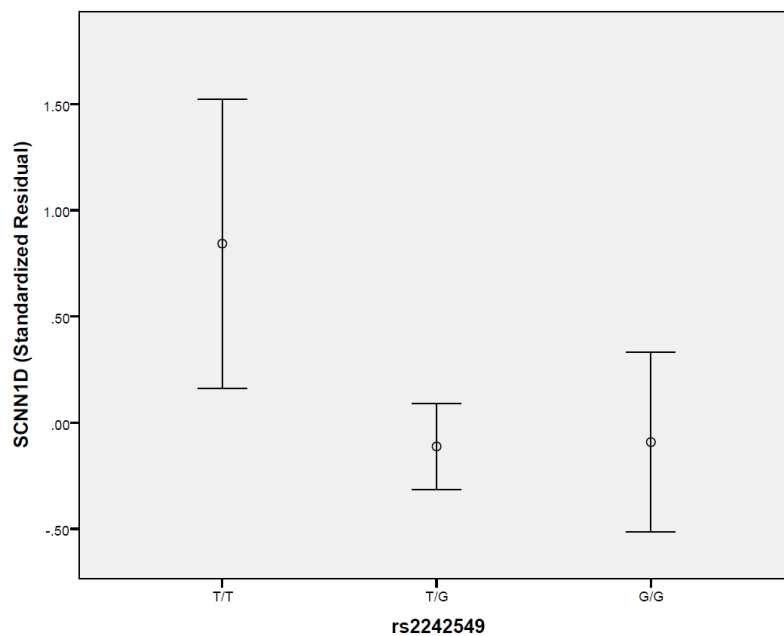

c)

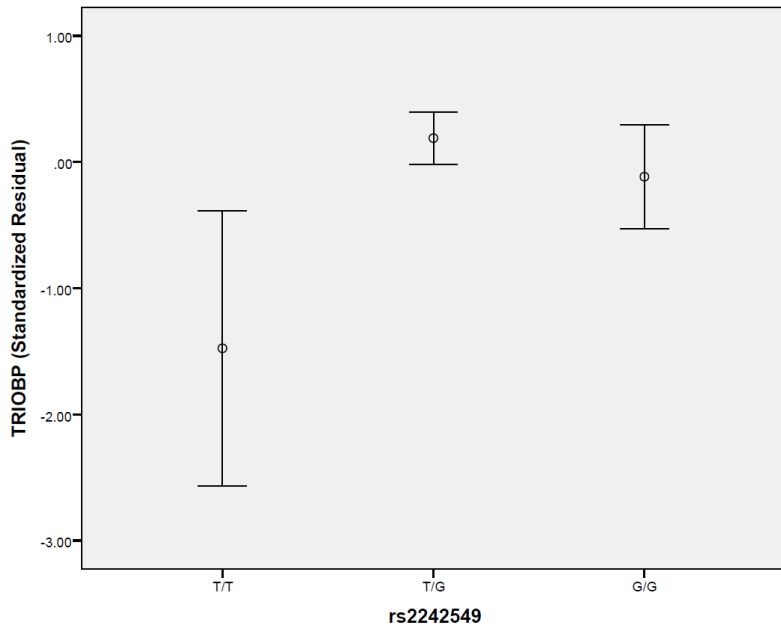

d)

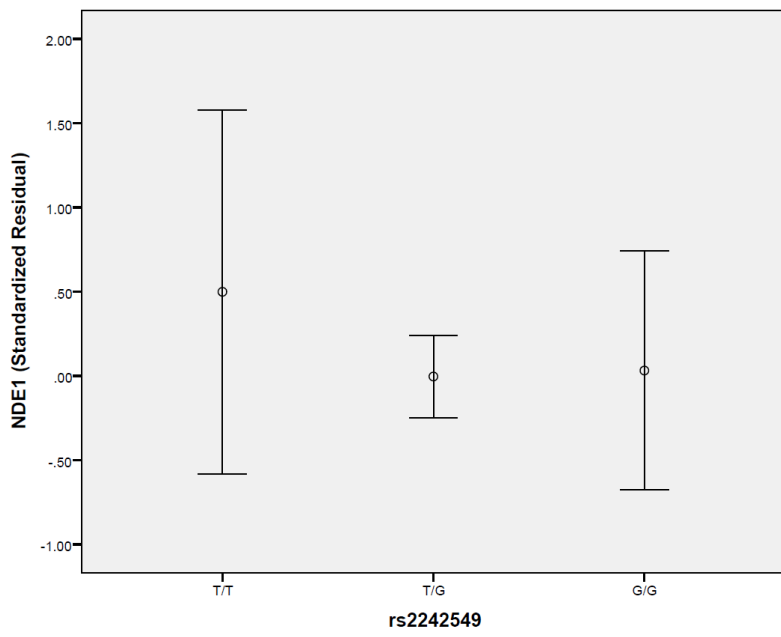

**Figure S2:** Power estimation of the discovery cohort to study the role of the *NDE1* SNP rs2242549 with the gene expression data (n=39) with two effect sizes. For both estimations, the observed 90th percentile of the standard deviation for all genes from our data ( $\sigma = 0.527$ ), and the value of estimated proportion of non-differentially expressed probes based on qvalue-calculations ( $\pi_0 = 0.485$ ) were used. The effect size of the estimation a) was the maximum observed in our discovery cohort ( $\Delta = 0.52$ ), and b) the minimum effect size able to give the power of 80 % ( $\Delta = 0.250$ ). For probes with smaller standard deviations, the power is underestimated.

a)

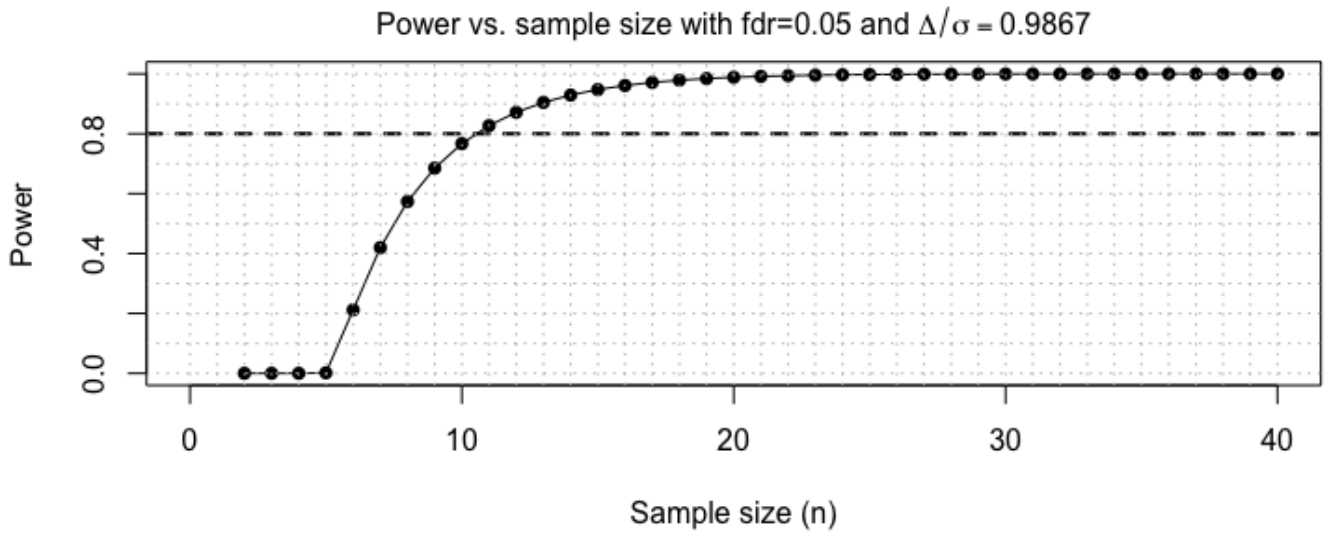

b)

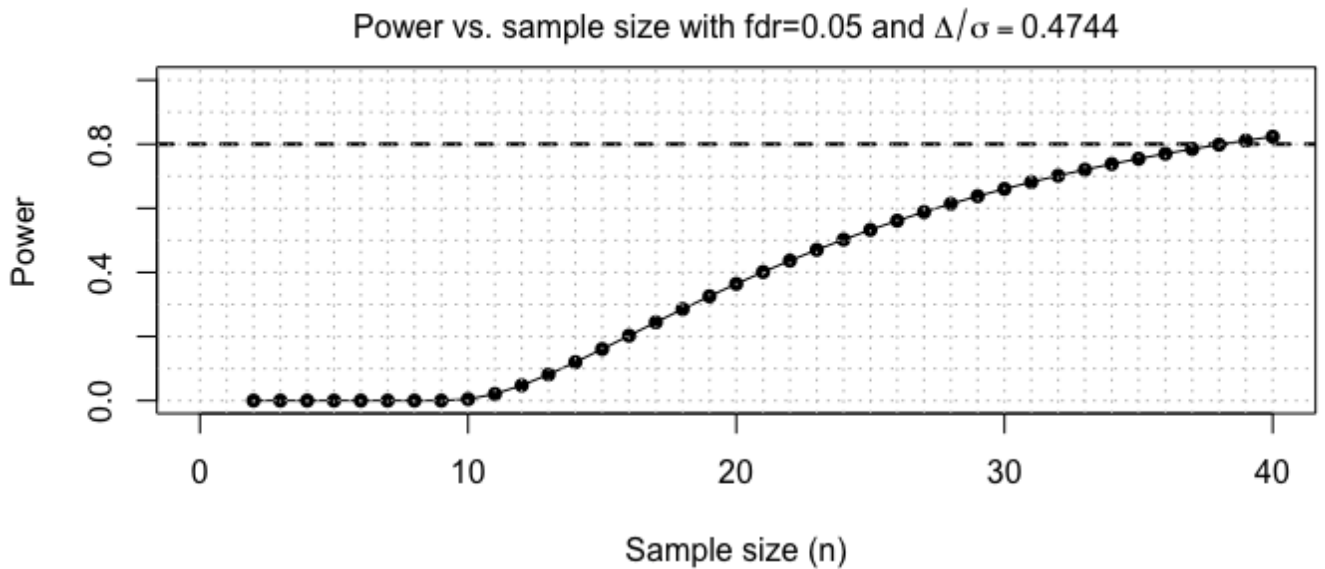

**Figure S3:**

Graphical representation of the gender by genetic interaction effect on medication groupings. Significance values can be found in Table 2.

All psychoactive drugs metabolised by CYP2C19 (Amitriptyline, Citalopram, Diazepam, Escitalopram, Fluoxetine, Mianserin, Sertaline)

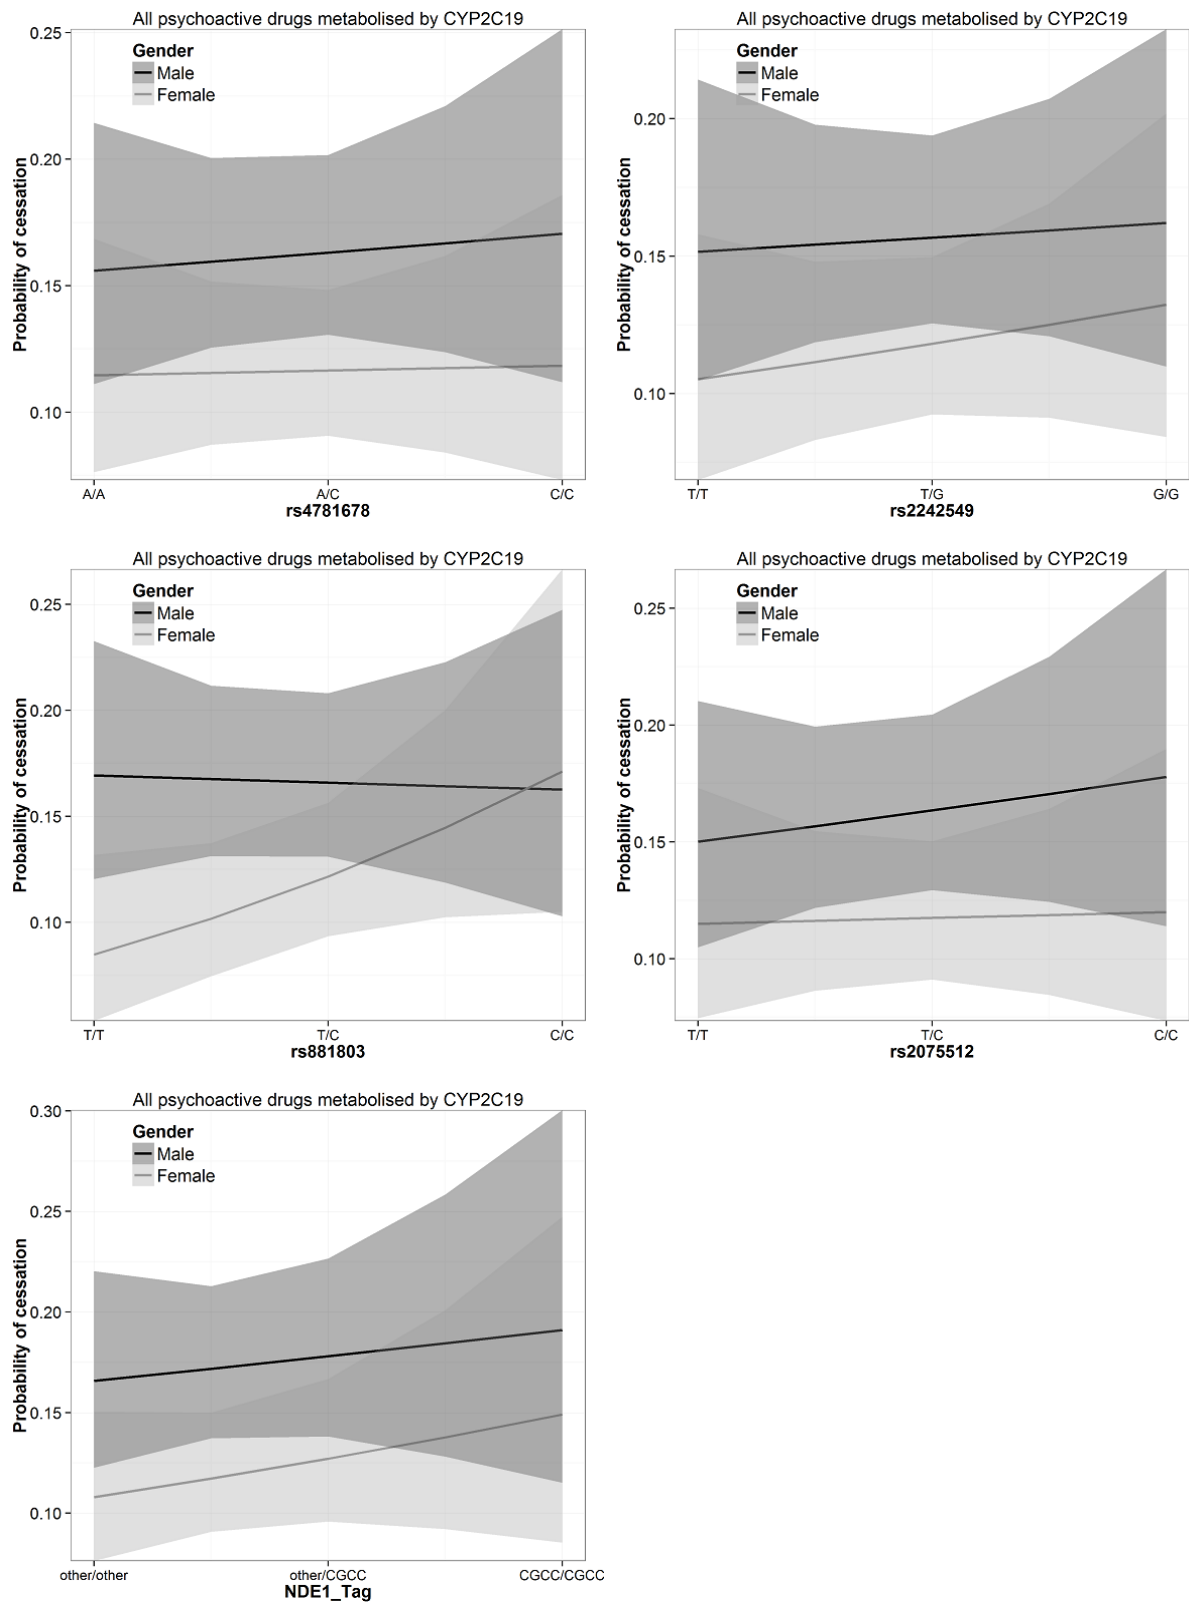

SSRIs (Citalopram, Escitalopram, Fluvoxamine, Fluoxetine, Paroxetine, Sertaline)

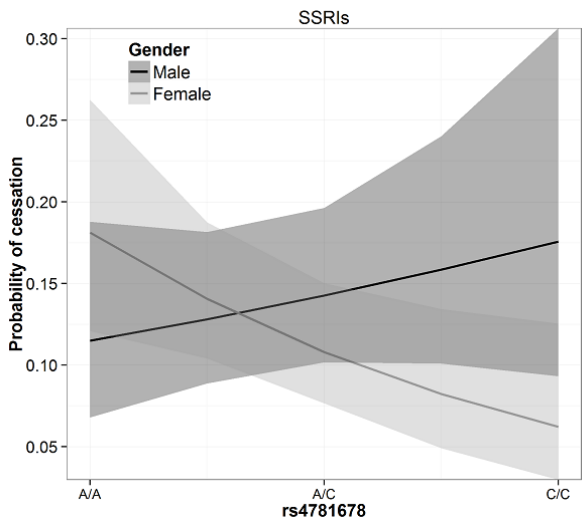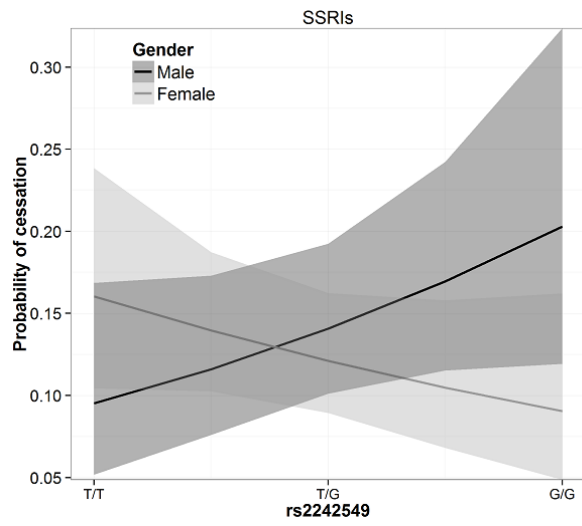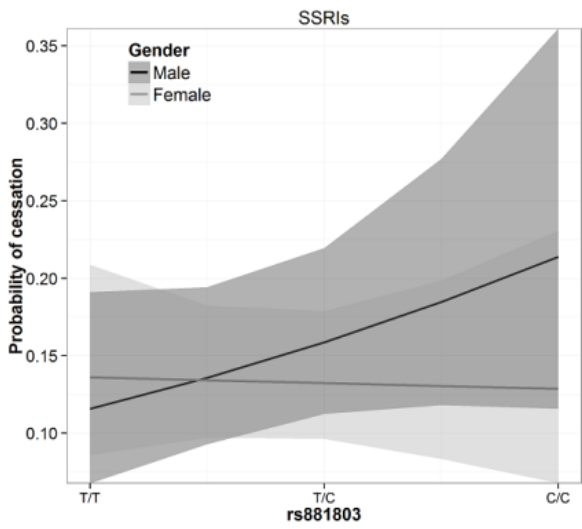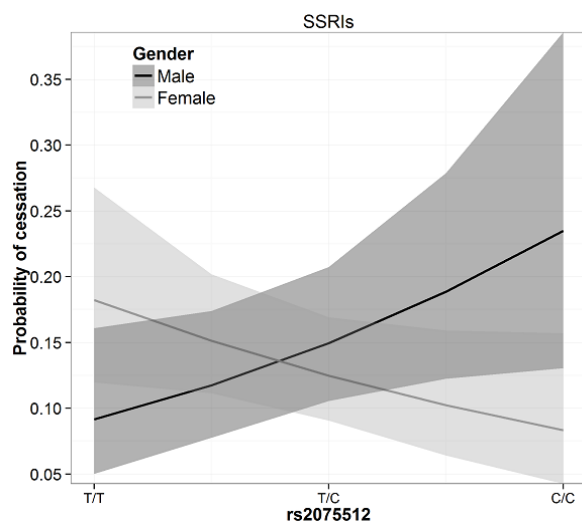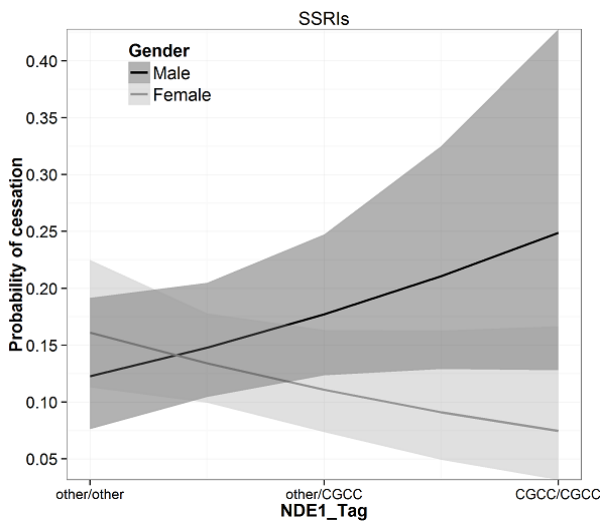

SSRIs metabolised by CYP2C19 (Citalopram, Escitalopram, Fluoxetine)

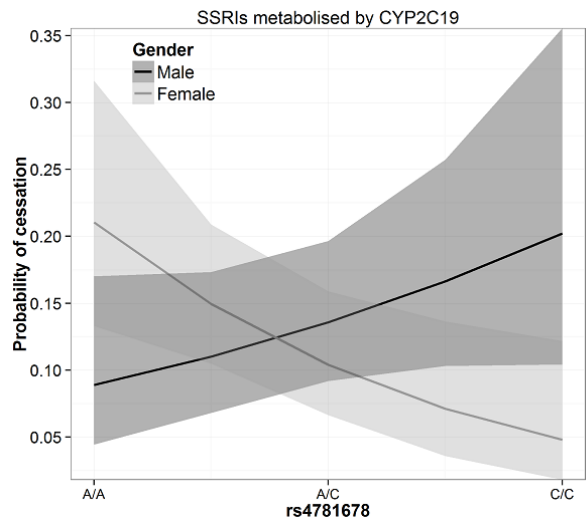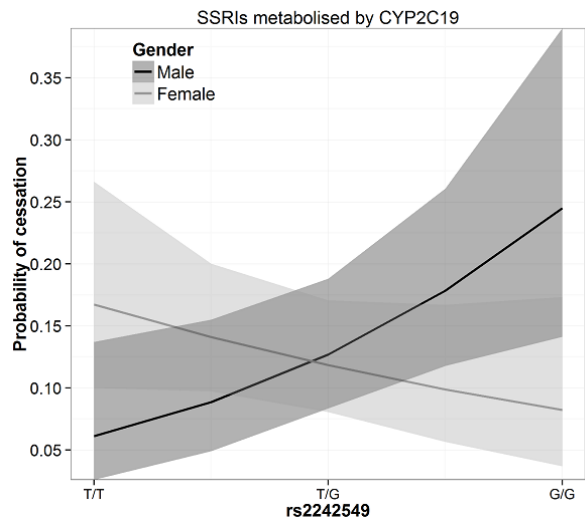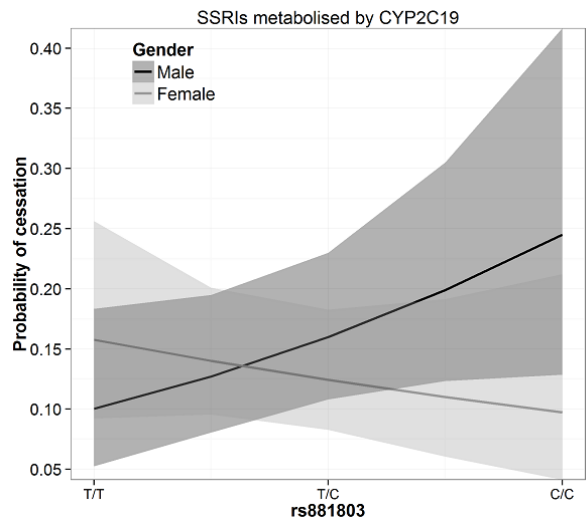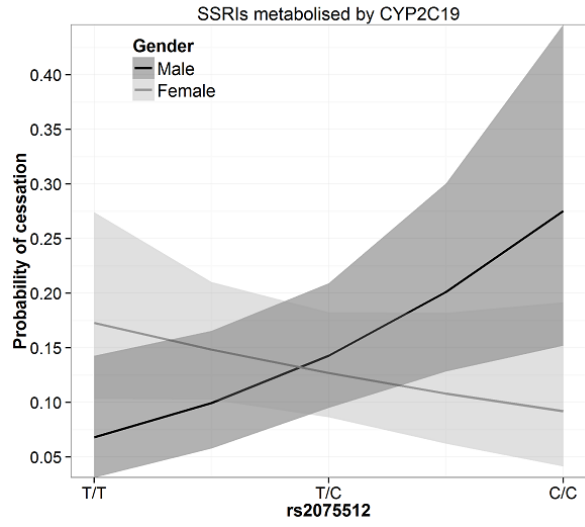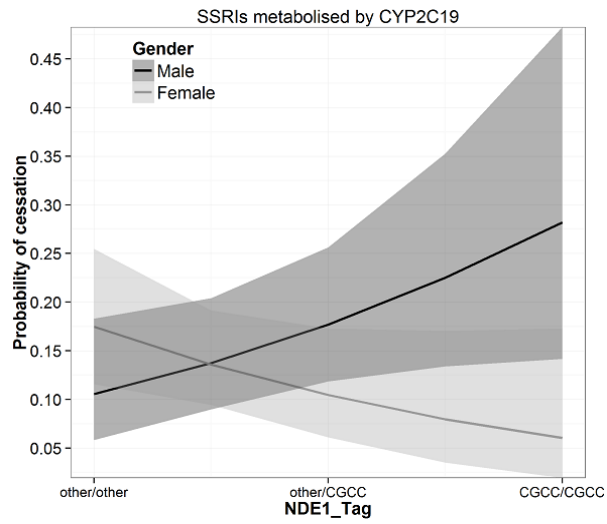

SSRIs not metabolised by CYP2C19 (Fluvoxamine, Paroxetine, Sertaline)

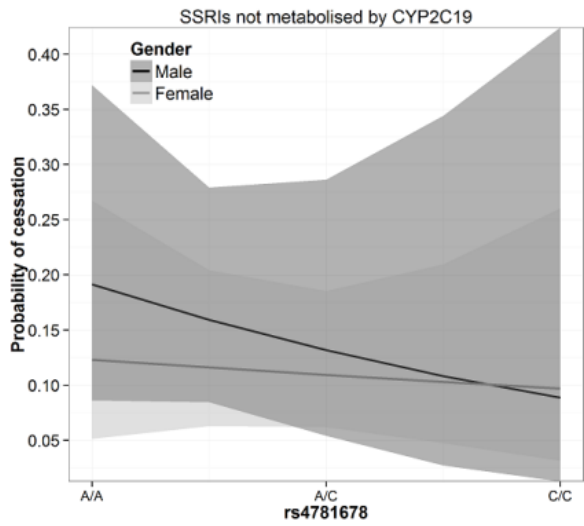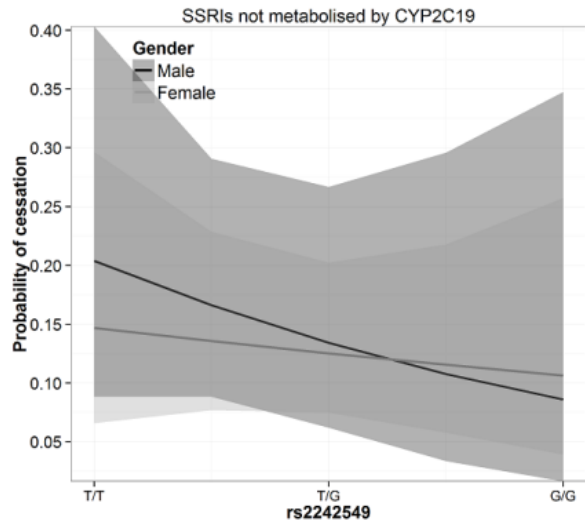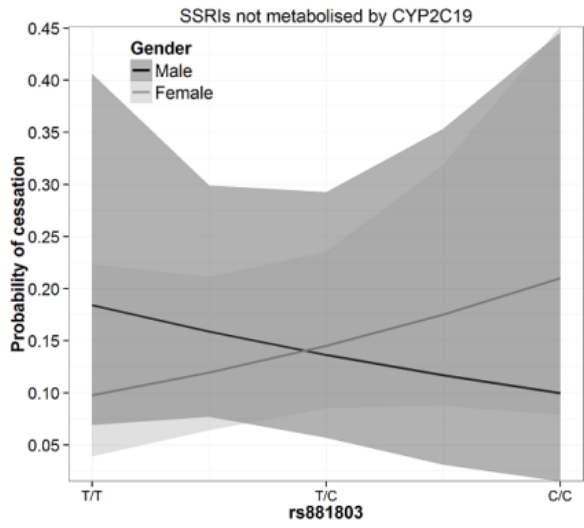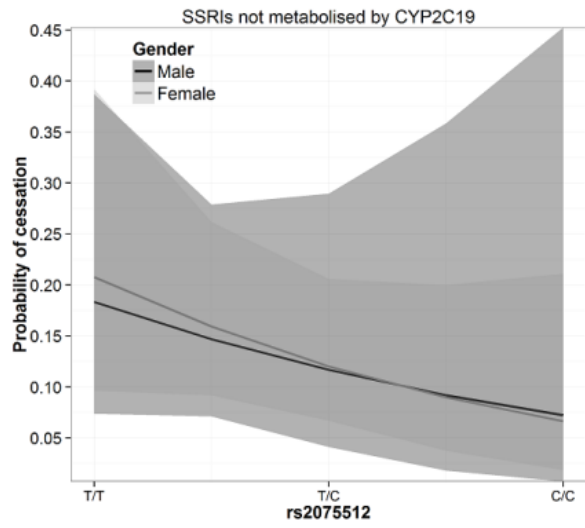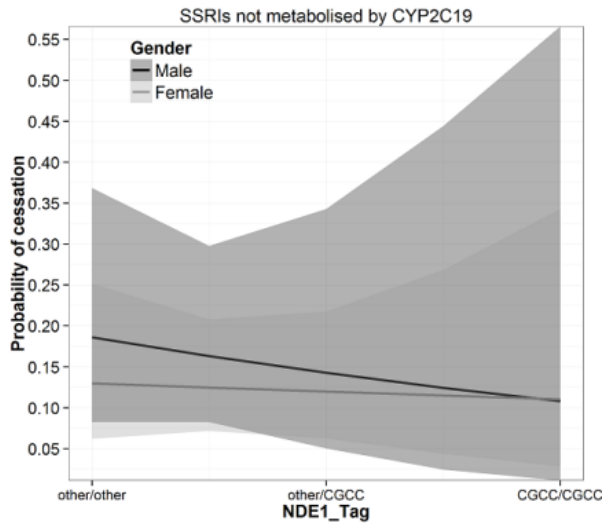



Non-SSRIs metabolised by CYP2C19 (Amitriptyline, Diazepam, Mianserin)

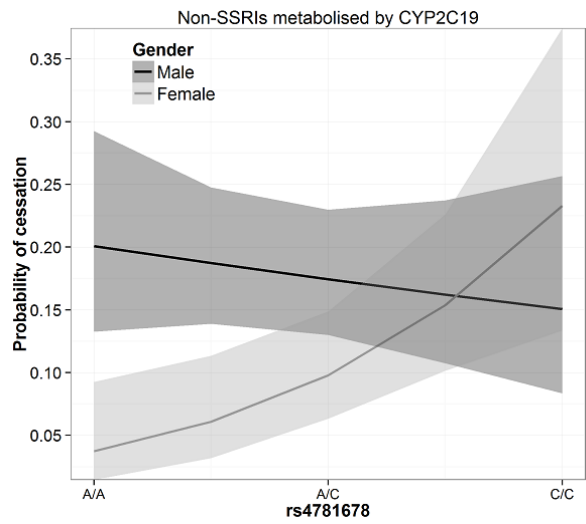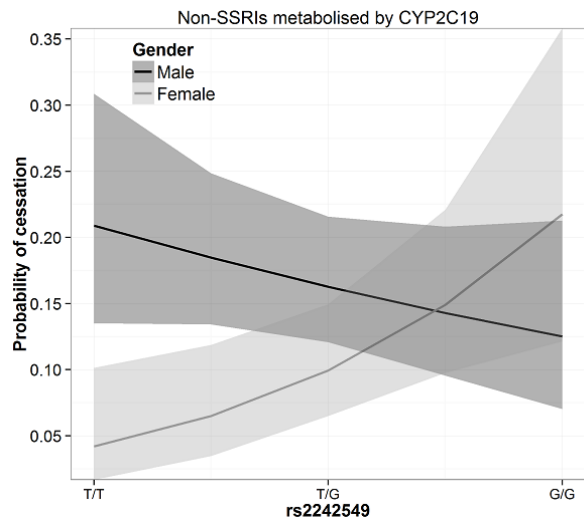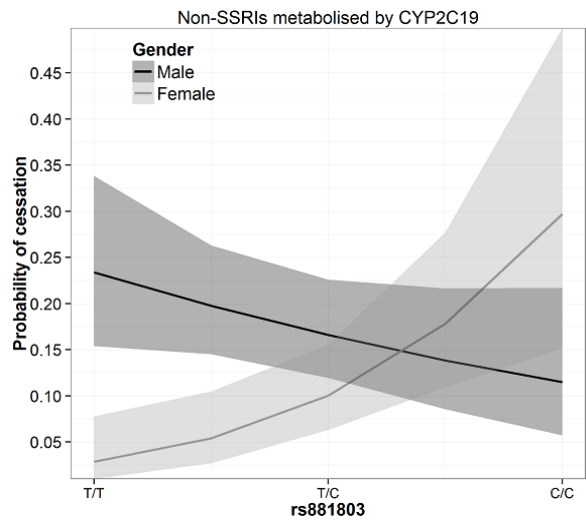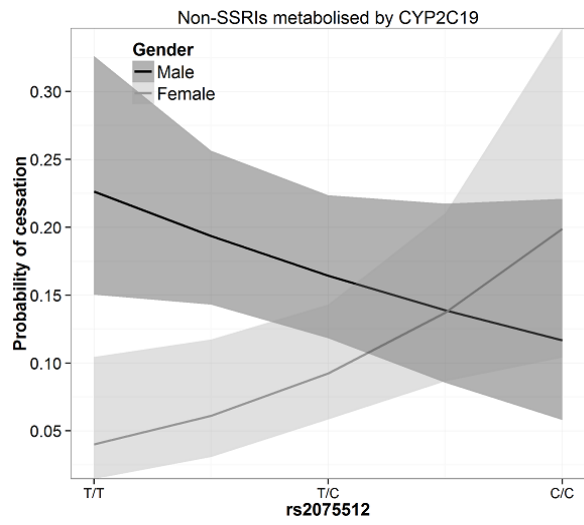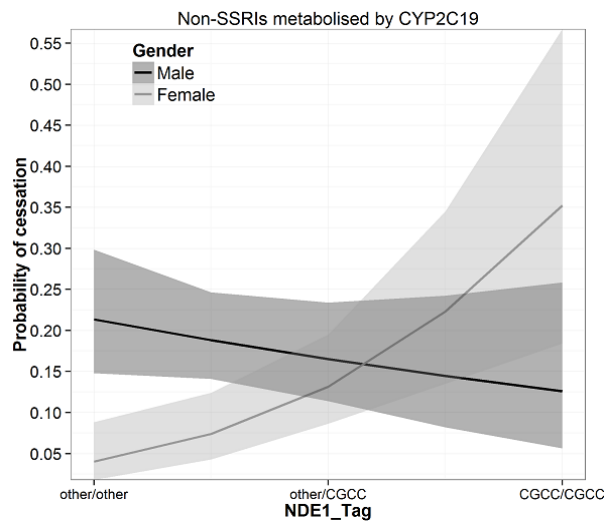

## TABLES

**Table S1:** Results of the genome wide gene expression analysis and replication. Sheet 1 (Table S1 a) p-value <0.05) lists all probes that were significantly altered for each of the five DISC1 network variants tested at the p-value threshold of p<0.05. Table includes effect size ( $\beta$ ), standard error, t value and p-value for the three cohorts tested. In addition it lists those genes replicated from our previous study, and the q-value for the study in the family cohort. Sheet 2 (Table S1 b) q-value <0.05) list all the same properties as in Sheet 1, but restricted to those probes with a  $q \leq 0.05$  after applying the False Discovery Rate.

Separate Excel File: Table S1.xlsx

**Table S2:** Results of the association analysis between individual psychoactive medications and the variants studied. a) p-values for the additive model controlling for gender, b) p-values for the additive model in interaction with gender, c) Odds ratios (and 95% CI) for the interaction terms that were significant at the uncorrected p-value  $\leq 0.05$  level. P-values, and their respective ORs, below 0.0021 are below the Bonferroni correction threshold for the 24 medications tested.

a)

|                 | <i>DISC1</i><br>rs821616 | <i>NDE1</i><br>rs4781678 | <i>NDE1</i><br>rs2242549 | <i>NDE1</i><br>rs881803 | <i>NDE1</i><br>rs2075512 | <i>NDE1</i> Tag<br>Haplotype | <i>PDE4B</i><br>rs7412571 |
|-----------------|--------------------------|--------------------------|--------------------------|-------------------------|--------------------------|------------------------------|---------------------------|
| Tramadol        | 0.96                     | 0.93                     | 0.43                     | 0.36                    | 0.42                     | 0.57                         | 0.041                     |
| Paracetamol     | 0.64                     | 0.53                     | 0.79                     | 0.45                    | 0.82                     | 0.35                         | 0.081                     |
| Biperiden       | 0.77                     | 0.37                     | 0.54                     | 0.24                    | 0.62                     | 0.20                         | 0.78                      |
| Chlorpromazine  | 0.50                     | 0.79                     | 0.095                    | 0.35                    | 0.15                     | 0.67                         | 0.054                     |
| Levomepromazine | 0.98                     | <b>0.0009</b>            | 0.056                    | 0.019                   | 0.0022                   | 0.018                        | 0.17                      |
| Perphenazine    | 0.78                     | 0.54                     | 0.33                     | 0.52                    | 0.71                     | 0.48                         | 0.19                      |
| Thioridazine    | 0.048                    | 0.12                     | 0.10                     | 0.16                    | 0.83                     | 0.31                         | 0.94                      |
| Haloperidol     | 0.82                     | 0.69                     | 0.66                     | 0.68                    | 0.64                     | 0.98                         | 0.061                     |
| Chlorprothixene | 0.74                     | 0.35                     | 0.60                     | 0.20                    | 0.32                     | 0.34                         | 0.65                      |
| Zuclopenthixol  | 0.60                     | 0.31                     | 0.15                     | 0.85                    | 0.29                     | 0.80                         | 0.24                      |
| Clozapine       | 0.50                     | 0.79                     | 0.91                     | 0.93                    | 0.66                     | 0.64                         | 0.80                      |
| Olanzapine      | 0.78                     | 0.38                     | 0.10                     | 0.27                    | 0.23                     | 0.64                         | 0.32                      |
| Quetiapine      | 0.02                     | 0.30                     | 0.58                     | 0.76                    | 0.89                     | 0.92                         | 0.74                      |
| Risperidone     | 0.23                     | 0.068                    | 0.49                     | 0.63                    | 0.081                    | 0.061                        | 0.70                      |
| Diazepam        | 0.14                     | 0.20                     | 0.63                     | 0.64                    | 0.68                     | 0.28                         | 0.0083                    |
| Oxazepam        | 0.67                     | 0.57                     | 0.71                     | 0.90                    | 0.10                     | 0.19                         | 0.45                      |
| Temazepam       | 0.38                     | 0.17                     | 0.017                    | 0.15                    | 0.77                     | 1.00                         | 0.041                     |
| Zopiclone       | 0.43                     | 0.66                     | 0.57                     | 0.83                    | 0.98                     | 0.67                         | 0.85                      |
| Amitriptyline   | 0.68                     | 0.057                    | 0.29                     | 0.27                    | 0.52                     | 0.034                        | 0.75                      |
| Fluoxetine      | 0.56                     | 0.18                     | 0.88                     | 0.89                    | 0.67                     | 0.66                         | 0.35                      |
| Citalopram      | 0.79                     | 0.86                     | 0.48                     | 0.55                    | 0.44                     | 0.81                         | 0.94                      |
| Sertraline      | 0.98                     | 0.72                     | 0.35                     | 0.43                    | 0.32                     | 0.92                         | 0.77                      |
| Mianserin       | 0.90                     | 0.16                     | 0.42                     | 0.36                    | 0.16                     | 0.34                         | 0.68                      |
| Mirtazapine     | 0.64                     | 0.20                     | 0.35                     | 0.69                    | 0.29                     | 0.65                         | 0.81                      |

p-values that are below the Bonferroni threshold are in bold.

b)

|                 | <i>DISC1</i><br>rs821616 | <i>NDE1</i><br>rs4781678 | <i>NDE1</i><br>rs2242549 | <i>NDE1</i><br>rs881803 | <i>NDE1</i><br>rs2075512 | <i>NDE1</i> Tag<br>Haplotype |
|-----------------|--------------------------|--------------------------|--------------------------|-------------------------|--------------------------|------------------------------|
| Tramadol        | 0.092                    | 0.91                     | 0.67                     | 0.43                    | 0.56                     | 0.95                         |
| Paracetamol     | 0.14                     | 0.48                     | 0.66                     | 0.33                    | 0.74                     | 0.43                         |
| Biperiden       | 0.53                     | 0.21                     | 0.35                     | 0.41                    | 0.53                     | 0.43                         |
| Chlorpromazine  | 0.24                     | 0.39                     | 0.71                     | 0.80                    | 0.77                     | 0.90                         |
| Levomepromazine | 0.35                     | 0.35                     | 0.18                     | 0.28                    | 0.23                     | 0.091                        |
| Perphenazine    | 0.18                     | 0.67                     | 0.41                     | 0.37                    | 0.83                     | 0.44                         |
| Thioridazine    | 0.87                     | 0.67                     | 0.56                     | 0.21                    | 0.25                     | 0.37                         |
| Haloperidol     | 0.096                    | 0.55                     | 0.73                     | 0.61                    | 0.86                     | 0.60                         |
| Chlorprothixene | 0.40                     | 0.14                     | 0.029                    | 0.036                   | 0.29                     | 0.35                         |
| Zuclopendixol   | 0.11                     | 0.91                     | 0.92                     | 0.14                    | 1.00                     | na                           |
| Clozapine       | 0.83                     | 0.051                    | 0.67                     | 0.93                    | 0.048                    | 0.75                         |
| Olanzapine      | 0.81                     | 0.76                     | 0.92                     | 0.85                    | 0.71                     | 0.73                         |
| Quetiapine      | 0.87                     | 0.87                     | 0.63                     | 0.23                    | 0.75                     | 0.75                         |
| Risperidone     | 0.29                     | 0.067                    | 0.022                    | 0.27                    | 0.17                     | 0.64                         |
| Diazepam        | 0.02                     | 0.009                    | 0.007                    | <b>0.0015</b>           | 0.0078                   | <b>0.0016</b>                |
| Oxazepam        | 0.04                     | 0.49                     | 0.16                     | 0.66                    | 0.26                     | 0.65                         |
| Temazepam       | 0.12                     | 0.50                     | 0.91                     | 0.51                    | 0.86                     | 0.69                         |
| Zopiclone       | 0.60                     | 0.099                    | 0.031                    | 0.005                   | 0.46                     | 0.11                         |
| Amitriptyline   | 0.47                     | 0.96                     | 0.71                     | 0.31                    | 0.076                    | 0.82                         |
| Fluoxetine      | 0.27                     | 0.21                     | 0.49                     | 0.51                    | 0.23                     | 0.031                        |
| Citalopram      | 0.36                     | 0.0042                   | <b>0.0013</b>            | 0.055                   | 0.0023                   | 0.026                        |
| Sertraline      | 0.92                     | 0.94                     | 0.47                     | 0.19                    | 0.37                     | 0.80                         |
| Mianserin       | 0.56                     | 0.055                    | 0.019                    | 0.0023                  | 0.0058                   | 0.0023                       |
| Mirtazapine     | 0.64                     | 0.46                     | 0.46                     | 0.82                    | 0.34                     | 0.55                         |

p-values that are below the Bonferroni threshold are in bold.

na = instances where, despite the frequency cut-offs enforced, not enough data points were available for statistical analysis.

Genotype cut-off minor homozygote frequency  $\geq 0.05$ ; Drug usage frequency cut-off = a medication has been used for 3 months or less  $\geq 15$  times.

c)

|                 | <i>DISC1</i><br>rs821616 | <i>NDE1</i><br>rs4781678 | <i>NDE1</i><br>rs2242549          | <i>NDE1</i><br>rs881803            | <i>NDE1</i><br>rs2075512 | <i>NDE1</i> Tag<br>Haplotype       |
|-----------------|--------------------------|--------------------------|-----------------------------------|------------------------------------|--------------------------|------------------------------------|
| Chlorprothixene | -                        | -                        | 9.21<br>(1.26-67.33)              | 4.94<br>(1.11-22.05)               | -                        | -                                  |
| Clozapine       | -                        | -                        | -                                 | -                                  | 3.35<br>(1.01-11.09)     | -                                  |
| Risperidone     | -                        | -                        | 0.35<br>(0.14 - 0.86)             | -                                  | -                        | -                                  |
| Diazepam        | 3.67<br>(1.23-10.97)     | 4.28<br>(1.44-12.74)     | 4.28<br>(1.49-12.31)              | <b>6.20</b><br><b>(2.02-19.09)</b> | 5.14<br>(1.54-17.17)     | <b>6.13</b><br><b>(1.99-18.85)</b> |
| Oxazepam        | 0.26<br>(0.07-0.94)      | -                        | -                                 | -                                  | -                        | -                                  |
| Zopiclone       | -                        | -                        | 4.42<br>(1.15-17.03)              | 6.07<br>(1.72-21.42)               | -                        | -                                  |
| Fluoxetine      | -                        | -                        | -                                 | -                                  | -                        | 0.13<br>(0.02-0.84)                |
| Citalopram      | -                        | 0.22<br>(0.08-0.62)      | <b>0.21</b><br><b>(0.08-0.54)</b> | -                                  | 0.21<br>(0.07-0.57)      | 0.33<br>(0.12-0.88)                |
| Mianserin       | -                        | -                        | 7.22<br>(1.38-37.00)              | 37.32<br>(3.62-384.18)             | 21.78<br>(2.45-194.05)   | 115.91<br>(5.42-2476.98)           |

Odds ratios that are below the Bonferroni threshold are in bold.

**Table S3:** Drug names used in this article, their corresponding ATC code and classification, and their main metabolising enzyme(s)

|                                 | <b>ATC Code</b> | <b>Use</b>                        | <b>Class</b>                                     | <b>Metabolising Enzyme(s)<sup>1</sup></b>           |
|---------------------------------|-----------------|-----------------------------------|--------------------------------------------------|-----------------------------------------------------|
| <b>Tramadol</b>                 | N02AX02         | Opioids                           | Other                                            | CYP2D6, CYP3A4                                      |
| <b>Paracetamol</b>              | N02BE01         | Other analgesics and antipyretics | Anilides                                         | CYP2E1, CYP2A6, CYP3A4, CYP1A2                      |
| <b>Biperiden</b>                | N04AA02         | Anticholinergic agents            | Tertiary amines                                  |                                                     |
| <b>Chlorpromazine</b>           | N05AA01         | Antipsychotics                    | Phenothiazines with aliphatic side-chain         | CYP2D6                                              |
| <b>Levomepromazine</b>          | N05AA02         | Antipsychotics                    | Phenothiazines with aliphatic side-chain         | CYP2D6                                              |
| <b>Perphenazine</b>             | N05AB03         | Antipsychotics                    | Phenothiazines with piperazine structure         | CYP2D6                                              |
| <b>Thioridazine</b>             | N05AC02         | Antipsychotics                    | Phenothiazines with piperidine structure         | CYP2D6                                              |
| <b>Haloperidol</b>              | N05AD01         | Antipsychotics                    | Butyrophenone derivatives                        | CYP2D6, CYP3A4, CYP3A5, CYP3A7, CYP1A2              |
| <b>Chlorprothixene</b>          | N05AF03         | Antipsychotics                    | Thioxanthene Derivative                          |                                                     |
| <b>Zuclopenthixol</b>           | N05AF05         | Antipsychotics                    | Thioxanthene Derivative                          | CYP2D6                                              |
| <b>Clozapine</b>                | N05AH02         | Antipsychotics                    | Diazepines, oxazepines, thiazepines and oxepines | CYP1A2, CYP3A4                                      |
| <b>Olanzapine</b>               | N05AH03         | Antipsychotics                    | Diazepines, oxazepines, thiazepines and oxepines | CYP1A2, CYP2D6                                      |
| <b>Quetiapine</b>               | N05AH04         | Antipsychotics                    | Diazepines, oxazepines, thiazepines and oxepines | CYP3A4, CYP3A5, CYP3A7                              |
| <b>Risperidone</b>              | N05AX08         | Antipsychotics                    | Other                                            | CYP2D6, CYP3A4                                      |
| <b>Diazepam</b>                 | N05BA01         | Anxiolytics                       | Benzodiazepine derivatives                       | <b>CYP2C19</b> , CYP3A4                             |
| <b>Oxazepam</b>                 | N05BA04         | Anxiolytics                       | Benzodiazepine derivatives                       |                                                     |
| <b>Temazepam</b>                | N05CD07         | Hypnotics and Sedatives           | Benzodiazepine derivatives                       | CYP3A4                                              |
| <b>Zopiclone</b>                | N05CF01         | Hypnotics and Sedatives           | Benzodiazepine related drugs                     | CYP3A4, CYP2C8                                      |
| <b>Amitriptyline</b>            | N06AA09         | Antidepressants                   | Non-selective monoamine reuptake inhibitors      | <b>CYP2C19</b> , CYP2D6, CYP1A2, CYP3A4             |
| <b>Fluoxetine</b>               | N06AB03         | Antidepressants                   | <b>Selective serotonin reuptake inhibitors</b>   | CYP2C9, CYP2D6, CYP3A4, <b>CYP2C19</b>              |
| <b>Citalopram</b>               | N06AB04         | Antidepressants                   | <b>Selective serotonin reuptake inhibitors</b>   | <b>CYP2C19</b> , CYP3A4, CYP2D6                     |
| <b>Paroxetine<sup>2</sup></b>   | N06AB05         | Antidepressants                   | <b>Selective serotonin reuptake inhibitors</b>   | CYP2D6                                              |
| <b>Sertraline</b>               | N06AB06         | Antidepressants                   | <b>Selective serotonin reuptake inhibitors</b>   | CYP2B6, <b>CYP2C19<sup>3</sup></b> , CYP2C9, CYP3A4 |
| <b>Fluvoxamine<sup>2</sup></b>  | N06AB08         | Antidepressants                   | <b>Selective serotonin reuptake inhibitors</b>   | CYP2D6, CYP1A2                                      |
| <b>Escitalopram<sup>2</sup></b> | N06AB10         | Antidepressants                   | <b>Selective serotonin reuptake inhibitors</b>   | <b>CYP2C19</b> , CYP3A4, CYP2D6                     |
| <b>Mianserin</b>                | N06AX03         | Antidepressants                   | Other                                            | CYP3A4, CYP1A2, <b>CYP2C19</b> , CYP2D6             |
| <b>Mirtazapine</b>              | N06AX11         | Antidepressants                   | Other                                            | CYP1A2, CYP2D6, CYP3A4                              |

1 From KEGG Drug database (49), DrugBank (47), PharmaGKB (46), and CPIC Guidelines for SSRIs (48)

2 Medication was not used frequently enough during the 10 years collected here for inclusion in analysis of singular drugs. Drug usage frequency cut-off = a medication has been used for 3 months or less  $\geq 15$  times.

3 Expressly stated in the DrugBank database (47) that CYP2C19 only plays a minor role in the metabolism of sertraline. Therefore it has not been grouped with the others that are metabolised by CYP2C19.
